# Supplementary material
Source: PubMed Central journal article supplement (PMC6309215)
Supplement: NIHMS1511127-supplement-1.pdf [file NIHMS1511127-supplement-1.pdf]

## Supplementary Information

### Structure of native lens connexin-46/50 intercellular channels by CryoEM

**Authors:** Janette B. Myers<sup>1,†</sup>, Bassam G. Haddad<sup>1,†</sup>, Susan E. O'Neill<sup>1</sup>, Dror S. Chorev<sup>3</sup>, Craig C. Yoshioka<sup>2</sup>, Carol V. Robinson<sup>3</sup>, Daniel M. Zuckerman<sup>2</sup> and Steve L. Reichow<sup>1,\*</sup>

**Affiliations:**

<sup>1</sup> Department of Chemistry, Portland State University, Portland OR 97201, U.S.A.

<sup>2</sup> Department of Biomedical Engineering, Oregon Health and Sciences University, Portland OR 97239, U.S.A.

<sup>3</sup> Physical and Theoretical Chemistry Laboratory, University of Oxford, Oxford OX1 3QZ, U.K.

<sup>†</sup>Indicates equal contribution

\*Correspondence: reichow@pdx.edu (S.L.R.)

## Supplementary Tables

### Supplementary Table 1

#### Summary of molecular dynamics simulation setup and conditions for Cx50, Cx46, Cx26 and Cx46/50 heteromeric/heterotypic models.

(\* n-terminal acetylation)

|                              | Connexin-50     | Connexin-50*    | Connexin-46     | Connexin-46*    | Connexin-26     | Connexin-26*    |
|------------------------------|-----------------|-----------------|-----------------|-----------------|-----------------|-----------------|
| <b>Total Atoms</b>           | 364,952         | 363,722         | 360,190         | 355,524         | 368,756         | 367,346         |
| Solvent                      | 196,248         | 194,928         | 191,346         | 191,310         | 194,856         | 193,548         |
| Lipids                       | 133,866         | 133,866         | 133,732         | 129,042         | 133,464         | 133,330         |
| Protein                      | 34,440          | 34,488          | 34,716          | 34,764          | 39,972          | 40,020          |
| Ions                         | 398             | 440             | 396             | 408             | 464             | 448             |
| Modelled Residues            | 2-97; 154-234   | 2-97; 154-234   | 2-97; 142-222   | 2-97; 142-222   | 1-109; 125-217  | 1-109; 125-217  |
| <b>Simulation Conditions</b> |                 |                 |                 |                 |                 |                 |
| Simulation Box (Å)           | 152 x 152 x 176 | 155 x 155 x 176 | 155 x 155 x 176 |
| Pressure (atm)               | 1               | 1               | 1               | 1               | 1               | 1               |
| Temperature (K)              | 310             | 310             | 310             | 310             | 310             | 310             |
| Time Step (fs)               | 1               | 2               | 1               | 2               | 2               | 2               |
| Equilibration Time (ns)      | 30              | 30              | 30              | 30              | 30              | 30              |
| Production Time (ns)         | 100             | 70              | 70              | 50              | 50              | 70              |
| seed # (10ns/seed)           | 2               | 6               | 2               | 5               | 3               | 4               |
| Total Time (ns)              | 150             | 160             | 120             | 130             | 110             | 140             |

| Connexin-46*/50* Models      | Heterotypic                                | Heteromeric (I)                | Heteromeric (II)               |
|------------------------------|--------------------------------------------|--------------------------------|--------------------------------|
| <b>Total Atoms</b>           | 363,884                                    | 361,412                        | 361,412                        |
| Solvent                      | 194,964                                    | 192,498                        | 192,498                        |
| Lipids                       | 133,866                                    | 133,866                        | 133,866                        |
| Protein                      | 34,626                                     | 34,626                         | 34,626                         |
| Ions                         | 428                                        | 422                            | 422                            |
| Modelled Residues            | Cx50: 2-97; 154-234<br>Cx46: 2-97; 142-222 | 2-97; 154-234<br>2-97; 142-222 | 2-97; 154-234<br>2-97; 142-222 |
| Point Group Symmetry         | C6                                         | C3                             | D3                             |
| <b>Simulation Conditions</b> |                                            |                                |                                |
| Simulation Box (Å)           | 152 x 152 x 176                            | 152 x 152 x 176                | 152 x 152 x 176                |
| Pressure (atm)               | 1                                          | 1                              | 1                              |
| Temperature (K)              | 310                                        | 310                            | 310                            |
| Time Step (fs)               | 2                                          | 2                              | 2                              |
| Equilibration Time (ns)      | 30                                         | 30                             | 30                             |
| Production Time (ns)         | 80                                         | 70                             | 70                             |
| seed #                       | 16                                         | 4                              | 4                              |
| Total Time (ns)              | 270                                        | 140                            | 140                            |

Asterisk indicates models that included modification by n-terminal acetylation. Connexin-26 models were derived from PDB 2ZW3<sup>10</sup>.

## Supplementary Table 2

Local resolution assessment of a calculated map based on the Cx46 atomic model versus the 3.4 Å resolution CryoEM density map.

| NTH       |         |         |         |         |         |         |           |         |         |         |         |         |         |         |
|-----------|---------|---------|---------|---------|---------|---------|-----------|---------|---------|---------|---------|---------|---------|---------|
| G2        | D3      | W4      | S5      | F6      | L7      | G8      | R9        | L10     | L11     | E12     | N13     | A14     | Q15     | E16     |
| 3.0-4.4   | 3.0-4.6 | 2.8-3.2 | 2.9-3.3 | 3.4-6.7 | 2.9-3.0 | 2.9-3.9 | 3.2-4.2   | 3.2-3.3 | 2.8-3.2 | 3.1-5.4 | 3.4-5.2 | 3.1-3.5 | 2.8-3.2 | 3.6-6.4 |
| TM1       |         |         |         |         |         |         |           |         |         |         |         |         |         |         |
| H17       | S18     | T19     | V20     | I21     | G22     | K23     | V24       | W25     | L26     | T27     | V28     | L29     | F30     | I31     |
| 3.0-3.3   | 2.9-3.0 | 2.8-3.2 | 2.8-3.0 | 3.1-3.2 | 2.8-2.9 | 2.8-3.1 | 3.0-3.1   | 2.8-3.1 | 2.8-3.0 | 3.0-3.4 | 2.8-2.9 | 2.8-2.9 | 2.8-3.3 | 2.9-3.4 |
| TM1       |         |         |         |         |         |         |           |         |         |         |         |         |         |         |
| F32       | R33     | I34     | L35     | V36     | L37     | G38     | A39       | A40     | A41     | E42     | E43     | V44     | W45     | G46     |
| 2.8-3.0   | 2.7-3.0 | 2.8-3.0 | 2.8-3.0 | 2.8-3.0 | 2.9-3.0 | 2.9-3.0 | 2.8-2.9   | 2.9-3.2 | 2.8-2.9 | 3.0-9.0 | 2.8-3.7 | 2.8-2.9 | 2.6-2.8 | 2.8-3.0 |
| EC1       |         |         |         |         |         |         | EC1 Helix |         |         |         |         |         |         |         |
| D47       | E48     | Q49     | S50     | D51     | F52     | T53     | C54       | N55     | T56     | Q57     | Q58     | P59     | G60     | C61     |
| 2.9-3.1   | 2.8-3.0 | 2.8-3.0 | 3.0-3.3 | 2.9-3.2 | 2.7-3.0 | 2.9-3.4 | 3.0-3.2   | 3.0-3.1 | 3.1-3.4 | 2.9-3.2 | 3.0-3.5 | 3.3-3.6 | 3.0-3.4 | 3.1-3.5 |
| EC1 Helix |         |         |         |         |         |         | TM2       |         |         |         |         |         |         |         |
| E62       | N63     | V64     | C65     | Y66     | D67     | R68     | A69       | F70     | P71     | I72     | S73     | H74     | V75     | R76     |
| 3.0-6.6   | 3.0-3.1 | 3.0-3.1 | 2.9-3.2 | 2.7-3.0 | 3.2-3.7 | 3.0-7.2 | 2.9-3.0   | 2.7-3.2 | 2.8-3.1 | 2.9-3.1 | 2.9-3.1 | 3.0-3.1 | 2.8-2.9 | 2.9-3.0 |
| TM2       |         |         |         |         |         |         |           |         |         |         |         |         |         |         |
| F77       | W78     | V79     | L80     | Q81     | I82     | I83     | F84       | V85     | S86     | T87     | P88     | T89     | L90     | I91     |
| 2.8-3.1   | 2.8-3.0 | 2.7-2.9 | 2.8-2.9 | 2.8-3.1 | 2.8-3.0 | 2.7-2.8 | 2.8-3.0   | 2.7-3.0 | 2.8-2.9 | 3.0-3.2 | 2.8-3.3 | 2.8-3.1 | 3.1-3.3 | 3.1-4.1 |
| TM2       |         |         |         |         |         | ICL     | TM3       |         |         |         |         |         |         |         |
| Y92       | L93     | G94     | H95     | V96     | L97     | L142    | L143      | R144    | T145    | Y146    | V147    | F148    | N149    |         |
| 3.0-3.3   | 3.0-3.1 | 3.1-4.0 | 4.5-7.9 | 3.1-3.4 | 3.0-3.2 | 3.3-3.8 | 3.3-3.6   | 3.6-6.1 | 3.3-3.7 | 2.8-3.3 | 3.2-3.8 | 3.2-7.0 | 2.9-3.0 |         |
| TM3       |         |         |         |         |         |         |           |         |         |         |         |         |         |         |
| I150      | I151    | F152    | K153    | T154    | L155    | F156    | E157      | V158    | G159    | F160    | I161    | A162    | G163    | Q164    |
| 2.9-3.2   | 3.2-3.3 | 3.0-5.8 | 2.7-3.0 | 3.1-3.2 | 3.2-3.7 | 3.0-3.7 | 3.0-3.2   | 3.2-3.6 | 4.1-4.4 | 2.9-3.3 | 3.3-3.7 | 4.0-4.4 | 3.4-4.2 | 2.9-3.2 |
| TM3       |         |         |         |         |         |         | EC2       |         |         |         |         |         |         |         |
| Y165      | F166    | L167    | Y168    | G169    | F170    | Q171    | L172      | K173    | P174    | L175    | Y176    | R177    | C178    | D179    |
| 2.9-5.3   | 3.1-6.5 | 2.9-3.0 | 2.7-3.2 | 2.9-3.0 | 2.9-7.2 | 2.9-3.7 | 2.8-2.9   | 2.9-3.5 | 2.8-2.9 | 3.0-3.2 | 2.8-3.2 | 2.8-2.9 | 2.9-3.1 | 3.1-4.0 |
| EC2       |         |         |         |         |         |         | EC2       |         |         |         |         |         |         |         |
| R180      | W181    | P182    | C183    | P184    | N185    | T186    | V187      | D188    | C189    | F190    | I191    | S192    | R193    | P194    |
| 3.0-3.7   | 2.9-3.8 | 3.1-3.9 | 3.0-3.3 | 3.0-3.2 | 2.8-3.4 | 3.2-3.6 | 3.2-3.3   | 3.0-3.2 | 2.9-3.2 | 2.7-3.1 | 2.7-3.2 | 3.0-3.2 | 2.9-3.1 | 2.8-3.1 |
| TM4       |         |         |         |         |         |         |           |         |         |         |         |         |         |         |
| T195      | E196    | K197    | T198    | I199    | F200    | I201    | L202      | F203    | M204    | L205    | A206    | V207    | A208    | C209    |
| 2.9-3.2   | 2.9-3.0 | 2.8-3.0 | 3.1-3.4 | 2.9-3.0 | 2.7-2.9 | 2.9-3.1 | 2.8-3.0   | 2.9-3.1 | 2.8-3.0 | 3.0-3.2 | 3.0-3.2 | 2.7-2.9 | 2.9-3.0 | 2.9-7.2 |
| TM4       |         |         |         |         |         |         |           |         |         |         |         |         | CTD     |         |
| V210      | S211    | L212    | L213    | L214    | N215    | V216    | L217      | E218    | I219    | Y220    | H221    | L222    |         |         |
| 2.9-3.0   | 2.9-3.0 | 2.9-3.0 | 3.0-3.5 | 2.9-3.0 | 2.8-3.0 | 2.9-3.1 | 3.0-3.1   | 2.9-3.1 | 3.2-3.3 | 3.2-6.6 | 3.3-3.4 | 3.1-4.4 |         |         |

Values indicated by each residue correspond to the range of resolutions (Å) reported for amino acid sidechain densities using BlocRes<sup>70</sup>. Secondary structure and domain labels are indicated for the n-terminal helix (NTH), transmembrane helices (TM1-4) and extracellular domains (EC1-2) intracellular loop (ICL) and C-terminal domain (CTD).

### Supplementary Table 3

Local resolution assessment of a calculated map based on the Cx50 atomic model versus the 3.4 Å resolution CryoEM density map.

| NTH       |         |         |         |         |         |         |           |         |         |         |         |         |         |         |
|-----------|---------|---------|---------|---------|---------|---------|-----------|---------|---------|---------|---------|---------|---------|---------|
| G2        | D3      | W4      | S5      | F6      | L7      | G8      | N9        | I10     | L11     | E12     | E13     | V14     | N15     | E16     |
| 3.8-4.2   | 3.0-5.7 | 2.8-3.0 | 3.0-3.2 | 3.4-5.8 | 2.8-3.0 | 3.2-3.8 | 3.1-4.3   | 3.3-3.6 | 2.9-3.0 | 3.2-4.9 | 3.4-6.0 | 3.2-3.7 | 3.2-4.7 | 3.4-5.4 |
| TM1       |         |         |         |         |         |         |           |         |         |         |         |         |         |         |
| H17       | S18     | T19     | V20     | I21     | G22     | R23     | V24       | W25     | L26     | T27     | V28     | L29     | F30     | I31     |
| 3.2-4.3   | 3.0-3.1 | 3.3-3.9 | 3.2-3.7 | 3.3-3.4 | 3.6-4.0 | 3.2-6.6 | 3.0-3.1   | 3.0-3.4 | 3.0-3.8 | 3.1-3.3 | 2.8-3.1 | 2.9-3.1 | 2.9-3.6 | 3.0-3.3 |
| TM1       |         |         |         |         |         |         |           |         |         |         |         |         |         |         |
| F32       | R33     | I34     | L35     | I36     | L37     | G38     | T39       | A40     | A41     | E42     | F43     | V44     | W45     | G46     |
| 2.9-3.2   | 2.9-3.0 | 2.9-3.1 | 2.9-3.0 | 2.9-3.0 | 2.9-3.0 | 2.8-3.0 | 2.8-3.7   | 3.0-3.2 | 2.8-2.9 | 3.0-5.0 | 3.8-5.7 | 2.7-2.8 | 2.6-2.8 | 2.7-2.9 |
| EC1       |         |         |         |         |         |         | EC1 Helix |         |         |         |         |         |         |         |
| D47       | E48     | Q49     | S50     | D51     | F52     | V53     | C54       | N55     | T56     | Q57     | Q58     | P59     | G60     | C61     |
| 3.0-3.2   | 2.7-2.9 | 2.8-3.0 | 3.0-3.4 | 3.0-4.3 | 2.8-3.0 | 3.0-3.4 | 3.0-3.2   | 3.0-3.2 | 2.9-3.2 | 2.9-3.1 | 3.0-3.4 | 3.2-3.5 | 3.0-3.3 | 3.1-3.4 |
| EC1 Helix |         |         |         |         |         |         | TM2       |         |         |         |         |         |         |         |
| E62       | N63     | V64     | C65     | Y66     | D67     | E68     | A69       | F70     | P71     | I72     | S73     | H74     | I75     | R76     |
| 3.1-8.0   | 3.1-3.2 | 2.9-3.2 | 3.8-3.1 | 2.8-3.0 | 3.0-3.2 | 2.7-3.4 | 2.0-3.5   | 2.7-3.2 | 2.8-2.9 | 2.8-3.1 | 2.7-3.0 | 3.0-3.1 | 2.8-3.0 | 3.9-3.2 |
| TM2       |         |         |         |         |         |         |           |         |         |         |         |         |         |         |
| L77       | W78     | V79     | L80     | Q81     | I82     | I83     | F84       | V85     | S86     | T87     | P88     | S89     | L90     | V91     |
| 2.8-2.9   | 2.7-2.9 | 2.7-2.9 | 2.8-3.0 | 2.8-3.1 | 2.9-3.0 | 2.8-3.0 | 2.8-2.9   | 2.8-3.0 | 2.8-3.1 | 3.0-3.2 | 2.8-3.3 | 2.7-3.2 | 3.1-3.3 | 3.0-3.1 |
| TM2       |         |         |         |         |         | ICL     |           | TM3     |         |         |         |         |         |         |
| Y92       | L93     | G94     | H95     | A96     | V97     | L154    | L155      | R156    | T157    | Y158    | V159    | C160    | H161    |         |
| 3.2-3.6   | 3.0-3.1 | 3.1-4.1 | 3.2-8.0 | 3.3-3.5 | 3.1-4.3 | 3.2-3.5 | 3.2-3.4   | 3.5-7.0 | 4.0-4.9 | 2.9-3.5 | 3.2-4.0 | 3.1-4.2 | 2.8-3.8 |         |
| TM3       |         |         |         |         |         |         |           |         |         |         |         |         |         |         |
| I162      | I163    | F164    | K165    | T166    | L167    | F168    | E169      | V170    | G171    | F172    | I173    | V174    | G175    | H176    |
| 3.3-4.0   | 3.2-4.0 | 3.0-3.6 | 2.8-3.6 | 3.0-3.2 | 3.3-4.2 | 2.8-3.7 | 3.1-6.0   | 3.1-3.3 | 4.2-4.6 | 2.9-4.5 | 3.2-4.5 | 3.1-4.3 | 4.0-4.7 | 4.0-6.5 |
| TM3       |         |         |         |         |         |         | EC2       |         |         |         |         |         |         |         |
| Y177      | F178    | L179    | Y180    | G181    | F182    | Q183    | I184      | L185    | P186    | L187    | Y188    | R189    | C190    | S191    |
| 3.0-6.5   | 3.8-6.3 | 3.0-3.9 | 2.7-3.5 | 2.8-2.9 | 2.8-7.2 | 2.8-7.2 | 2.9-3.1   | 2.9-3.6 | 2.9-3.0 | 2.9-3.2 | 2.8-3.0 | 2.8-3.4 | 2.8-3.1 | 3.0-3.1 |
| EC2       |         |         |         |         |         |         |           |         |         |         |         |         |         |         |
| R192      | W193    | P194    | C195    | P196    | N197    | V198    | V199      | D200    | C201    | F202    | V203    | S204    | R205    | P206    |
| 3.0-5.7   | 3.0-4.0 | 2.9-3.9 | 3.0-3.2 | 3.0-3.2 | 3.2-3.7 | 3.1-3.7 | 3.2-3.4   | 3.0-3.2 | 3.0-3.1 | 2.8-2.9 | 2.8-3.1 | 3.1-3.2 | 2.8-2.9 | 2.9-3.1 |
| TM4       |         |         |         |         |         |         |           |         |         |         |         |         |         |         |
| T207      | E208    | K209    | T210    | I211    | F212    | I213    | L214      | F215    | M216    | L217    | S218    | V219    | A220    | S221    |
| 3.9-3.1   | 2.9-3.3 | 2.8-2.9 | 2.9-3.1 | 2.9-3.0 | 2.8-2.9 | 3.0-3.1 | 2.8-2.9   | 3.0-3.1 | 2.9-3.0 | 2.9-3.2 | 3.1-3.2 | 2.9-3.0 | 2.9-3.1 | 2.9-3.3 |
| TM4       |         |         |         |         |         |         |           |         |         |         |         | CTD     |         |         |
| V222      | S223    | L224    | F225    | L226    | N227    | I228    | L229      | E230    | M231    | S232    | H233    | L234    |         |         |
| 3.0-3.1   | 2.9-3.0 | 3.0-3.1 | 2.7-7.2 | 2.9-3.0 | 2.9-3.1 | 3.0-5.3 | 3.1-6.0   | 3.1-3.3 | 3.1-6.5 | 3.5-4.4 | 3.3-3.6 | 3.3-4.7 |         |         |

Values indicate by each residue correspond to the range of resolutions (Å) reported for amino acid sidechain densities using BlocRes<sup>70</sup>. Secondary structure and domain labels are indicated for the n-terminal helix (NTH), transmembrane helices (TM1-4) and extracellular domains (EC1-2) intracellular loop (ICL) and C-terminal domain (CTD).
