# Supplementary material
Source: PubMed Central journal article supplement (PMC6309215)
Supplement: NIHMS1511127-supplement-Suppl_Table_legend.pdf [file NIHMS1511127-supplement-Suppl_Table_legend.pdf]

**SI Guide:** Myers *et al.* 'Structure of native lens connexin-46/50 intercellular channels by CryoEM'

**Supplementary Table 1: Summary of molecular dynamics simulation setup and conditions for Cx50, Cx46, Cx26 and Cx46/50 heteromeric/heterotypic models.** Asterisk indicate models that included modification by n-terminal acetylation. Connexin-26 models were derived from PDB 2ZW3<sup>10</sup>.

**Supplementary Table 2: Local resolution assessment of a calculated map based on the Cx46 atomic model versus the 3.4 Å resolution CryoEM density map.** Values indicated by each residue correspond to the range of resolutions (Å) reported for amino acid sidechain densities using BlocRes<sup>70</sup>. Secondary structure and domain labels are indicated for the n-terminal helix (NTH), transmembrane helices (TM1-4) and extracellular domains (EC1-2) intracellular loop (ICL) and C-terminal domain (CTD).

**Supplementary Table 3: Local resolution assessment of a calculated map based on the Cx50 atomic model versus the 3.4 Å resolution CryoEM density map.** Values indicate by each residue correspond to the range of resolutions (Å) reported for amino acid sidechain densities using BlocRes<sup>70</sup>. Secondary structure and domain labels are indicated for the n-terminal helix (NTH), transmembrane helices (TM1-4) and extracellular domains (EC1-2) intracellular loop (ICL) and C-terminal domain (CTD).
